# Supplementary material
Source: PubMed Central journal article supplement (PMC6351978)
Supplement: ci8b00633_si_001.pdf [file ci8b00633_si_001.pdf]

# Supporting Information

## ezCADD: A Rapid 2D/3D Visualization Enabled Web Modeling Environment for Democratizing Computer-Aided Drug Design

Aoxiang Tao, Yuying Huang, Yasuhiro Shinohara, Matthew L. Caylor, Srinath Pashikanti, and Dong Xu\*

Department of Biomedical and Pharmaceutical Sciences, College of Pharmacy, Kasiska Division of Health Sciences, Idaho State University, Meridian ID 83642, USA

\* Correspondence: xudong@isu.edu; Tel.: +1-208-373-1832; ORCID: 0000-0001-7056-2728

---

### ezCADD User Questionnaire for First-Year Pharmacy Students

IRB Exempt Status Approved, Study Number: IRB-FY2019-38

Cohort size: 95 Exercise and survey duration: 20 minutes

Question #1 Before starting the ezCADD exercise, please rate your PRIOR hands-on experience in molecular visualization and modeling:

- a. Zero experience
- b. A little bit experience
- c. Some experience
- d. Good experience

Question #2 How does ezCADD visualization help you understand the structures of  $\beta$ 2 adrenergic receptor and its drug alprenolol?

- a. Not helpful
- b. Somewhat helpful
- c. Helpful
- d. Very helpful

Question #3 How does ezCADD molecular docking help you understand the process of drug-protein target binding and recognition?

- a. Not helpful
- b. Somewhat helpful
- c. Helpful
- d. Very helpful

Question #4 Were you able to follow the instructions and complete the molecular docking experiment on your own?

- a. Yes
- b. No
- c. Partially

37 Question #5 After completing the ezCADD exercise, please rate your hands-on experience  
38 in molecular visualization and modeling:

39 a. Zero experience

40 b. A little bit experience

41 c. Some experience

42 d. Good experience

43 Question #6 Please rate your overall ezCADD user experience:

44 a. Easy and user friendly

45 b. Difficult and not user friendly

---

46

47

### Student Survey Data

| Q1 response             | Count | Frequency |
|-------------------------|-------|-----------|
| Zero experience         | 30    | 31.58%    |
| A little bit experience | 31    | 32.63%    |
| Some experience         | 25    | 26.32%    |
| Good experience         | 9     | 9.47%     |
|                         |       |           |
| Q2 response             | Count | Frequency |
| Not helpful             | 0     | 0.00%     |
| Somewhat helpful        | 14    | 14.74%    |
| Helpful                 | 50    | 52.63%    |
| Very helpful            | 31    | 32.63%    |
|                         |       |           |
| Q3 response             | Count | Frequency |
| Not helpful             | 1     | 1.05%     |
| Somewhat helpful        | 20    | 21.05%    |
| Helpful                 | 53    | 55.79%    |
| Very helpful            | 21    | 22.11%    |
|                         |       |           |
| Q4 response             | Count | Frequency |
| Yes                     | 80    | 84.21%    |
| No                      | 2     | 2.11%     |
| Partially               | 13    | 13.68%    |
|                         |       |           |

| <b>Q5 response</b>              | <b>Count</b> | <b>Frequency</b> |
|---------------------------------|--------------|------------------|
| Zero experience                 | 0            | 0.00%            |
| A little bit experience         | 20           | 21.05%           |
| Some experience                 | 46           | 48.42%           |
| Good experience                 | 29           | 30.53%           |
|                                 |              |                  |
| <b>Q6 response</b>              | <b>Count</b> | <b>Frequency</b> |
| Easy and user friendly          | 84           | 88.42%           |
| Difficult and not user friendly | 11           | 11.58%           |
